# Supplementary material
Source: PubMed Central journal article supplement (PMC5575960)
Supplement: NIHMS890052-supplement-2.pdf [file NIHMS890052-supplement-2.pdf]

**Supplementary Table 4.** A list of all antibodies used in this study.

| anti-        | Company (or obtained from)   | Cat. No. (or Ref.) | Isotype                 | Application          | Dilution |
|--------------|------------------------------|--------------------|-------------------------|----------------------|----------|
| AP2 $\alpha$ | DSHB                         | 3B5                | Mouse IgG <sub>2b</sub> | Immunocytochemistry  | 1/50     |
| BRN3A        | Chemicon                     | MAB1585            | Mouse IgG <sub>1</sub>  | Immunocytochemistry  | 1/100    |
| c-Jun        | Cell Signaling Technology    | #9165              | Rabbit IgG              | Immunocytochemistry  | 1/50     |
| c-Jun        | BD Transduction Laboratories | 610326             | Mouse IgG <sub>2a</sub> | Western blotting     | 1/1000   |
| p-c-Jun      | Cell Signaling Technology    | #3270              | Rabbit IgG              | Immunocytochemistry  | 1/400    |
| p-c-Jun      | Cell Signaling Technology    | #3270              | Rabbit IgG              | Western blotting     | 1/1000   |
| cl-Casp3     | abcam                        | ab2302             | Rabbit IgG              | Immunohistochemistry | 1/500    |
| cl-CASP3     | Cell Signaling Technology    | #9661              | Rabbit IgG              | Immunocytochemistry  | 1/500    |
| cl-CASP3     | Cell Signaling Technology    | #9661              | Rabbit IgG              | Western blotting     | 1/1000   |
| GFAP         | Dako                         | Z 0334             | Rabbit IgG              | Immunocytochemistry  | 1/200    |
| H3           | Cell Signaling Technology    | #4499              | Rabbit IgG              | Western blotting     | 1/2000   |
| ac-H3        | Cell Signaling Technology    | #9649              | Rabbit IgG              | Western blotting     | 1/1000   |
| HNK1         | Sigma-Aldrich                | C6680              | Mouse IgM               | FACS sorting         | 1/100    |
| HNK1         | Sigma-Aldrich                | C6680              | Mouse IgM               | Immunocytochemistry  | 1/50     |
| HSP90        | Santa Cruz Biotechnology     | sc-7947            | Rabbit IgG              | Western blotting     | 1/5000   |
| ISL1/2       | DSHB                         | 39.4D5             | Mouse IgG <sub>2b</sub> | Immunocytochemistry  | 1/50     |
| Ki-67        | Thermo Fisher Scientific     | RB-1510            | Rabbit IgG              | Immunocytochemistry  | 1/500    |
| MF20         | DSHB                         | MF 20              | Mouse IgG <sub>2b</sub> | Immunocytochemistry  | 1/500    |
| NeuN         | abcam                        | ab104224           | Mouse IgG <sub>2a</sub> | Immunohistochemistry | 1/500    |
| p75          | Advanced Targeting Systems   | AB-N07             | Mouse IgG <sub>1</sub>  | FACS sorting         | 1/1000   |
| PRPH         | Santa Cruz Biotechnology     | sc-7604            | Goat IgG                | Immunocytochemistry  | 1/100    |
| RUNX1        | abcam                        | ab23980            | Rabbit IgG              | Immunocytochemistry  | 1/200    |
| Tuj1         | abcam                        | ab7751             | Mouse IgG <sub>1</sub>  | Immunohistochemistry | 1/1000   |
| TUJ1         | Covance                      | PRB-435P           | Rabbit IgG              | Immunocytochemistry  | 1/500    |
| ZIKV         | from a patient               | PMID: 27179424     | N/A                     | Immunohistochemistry | 1/2000   |
| ZIKVE        | BioFront Technologies        | BF-1176-56         | Mouse IgG <sub>1</sub>  | Immunocytochemistry  | 1/1000   |
| ZIKVE        | BioFront Technologies        | BF-1176-56         | Mouse IgG <sub>1</sub>  | Western blotting     | 1/5000   |

**Supplementary Table 5.** Sequences of primers used for qRT-PCR analysis.

| Genes           | Forward                    | Reverse                     |
|-----------------|----------------------------|-----------------------------|
| <i>FOS</i>      | 5'-GGGAGGACCTTATCTGTGCG-3' | 5'-ACACACTCCATGCGTTTTGC-3'  |
| <i>GAPDH</i>    | 5'-CCCACCACACTGAATCTCCC-3' | 5'-TACATGACAAGGTGCGGCTC-3'  |
| <i>HIST1H1B</i> | 5'-GGCAGTGAAGAAGACTCCGA-3' | 5'-TGCCTTTTTTCGGTTTGGCAG-3' |
| <i>HIST1H3B</i> | 5'-AGACAGCTCGGAAATCCACC-3' | 5'-AACGGTGAGGCTTTTTCACG-3'  |
| <i>HIST1H4H</i> | 5'-AGACCGTGACAGCAATGGAT-3' | 5'-CAAGCAGGAGCCTTAGCCAC-3'  |
| <i>JUN</i>      | 5'-CTTTTCAAAGCCGGGTAGCG-3' | 5'-TTTCTCTAAGAGCGCACGCA-3'  |
| <i>JUNB</i>     | 5'-CCAAGAGCGCATCAAAGTGG-3' | 5'-TGAGCGTCTTCACCTTGTCC-3'  |
